# Supplementary material for: Facile synthesis of highly ordered mesoporous silver using cubic mesoporous silica template with controlled surface hydrophobicity
Source: Royal Society of Chemistry journal article supplement (doi:10.1039/b811718g), 2008-12-12
Supplement: b811718g.pdf [file b811718g.pdf]

## Electronic Supporting Information

### Facile synthesis of highly ordered mesoporous silver using cubic mesoporous silica template with controlled surface hydrophobicity

Jeong Kuk Shon,<sup>a</sup> Soo Sung Kong,<sup>a</sup> Ji Man Kim,<sup>\*a</sup> Chang Hyun Ko,<sup>b</sup> Mingshi Jin,<sup>a</sup> Yoon Yun Lee,<sup>a</sup> Seong Hee Hwang,<sup>a</sup> Jeong Ah Yoon<sup>a</sup> and Jong-Nam Kim<sup>\*b</sup>

<sup>a</sup> Department of Chemistry, BK21 School of Chemical Materials Science and SKKU Advanced Institute of Nanotechnology, Sungkyunkwan University, Suwon, 440-746, Korea. Fax: 82 31 299 4179; Tel: 82 31 299 4177; E-mail: jimankim@skku.edu

<sup>b</sup> Separation Process Research Center, Korea Institute of Energy Research, Daejeon, 305-343, Korea. Tel: 82 42 860 3112; E-mail: jnkim@kier.re.kr

**Table S1** Physicochemical properties of mesoporous materials in the present work

| Materials <sup>a</sup> | Organic content (wt%) <sup>b</sup> | $S_{\text{BET}}$ ( $\text{m}^2 \text{g}^{-1}$ ) <sup>c</sup> | $V_{\text{tot}}$ ( $\text{cm}^3 \text{g}^{-1}$ ) <sup>d</sup> | $V_{\text{micro}}$ ( $\text{cm}^3 \text{g}^{-1}$ ) <sup>e</sup> | $D_{\text{p}}$ (nm) <sup>f</sup> |
|------------------------|------------------------------------|--------------------------------------------------------------|---------------------------------------------------------------|-----------------------------------------------------------------|----------------------------------|
| KIT-6                  | -                                  | 789                                                          | 1.05                                                          | 0.16                                                            | 7.7                              |
| PHP-KIT-6              | 1.2                                | 745                                                          | 1.00                                                          | 0.14                                                            | 7.6                              |
| HP-KIT-6               | 2.7                                | 641                                                          | 0.89                                                          | 0.10                                                            | 7.4                              |
| Mesoporous Ag          | -                                  | 27                                                           | 0.07                                                          | -                                                               | 12.5                             |

<sup>a</sup> PHP-KIT-6 and HP-KIT-6 denote partially hydrophobic KIT-6 and hydrophobic KIT-6, respectively. <sup>b</sup> Organic contents obtained by TGA analysis (weight loss between 200 °C and 600 °C). <sup>c</sup> BET surface areas calculated from the N<sub>2</sub> adsorption branches in the range of relative pressure ( $p/p_0$ ) = 0.05 – 0.20. <sup>d</sup> Total pore volumes measured at  $p/p_0$  = 0.99. <sup>e</sup> Micropore volumes (less than 2 nm of pore diameter) calculated at  $p/p_0$  = 0.16 using Horvath-Kawazoe formula. <sup>f</sup> Pore diameters obtained from N<sub>2</sub> adsorption branches by BJH method.

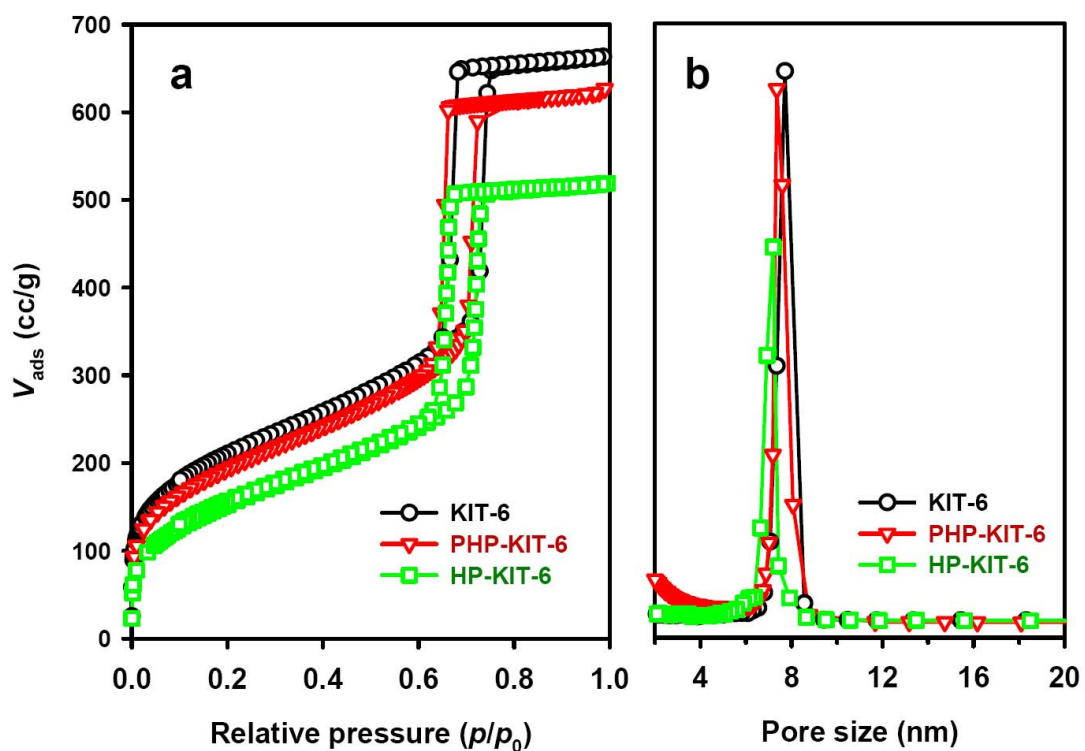

**Fig. S1** (a)  $\text{N}_2$  adsorption-desorption isotherms and (b) corresponding BJH pore size distribution curves for the mesoporous silica templates.

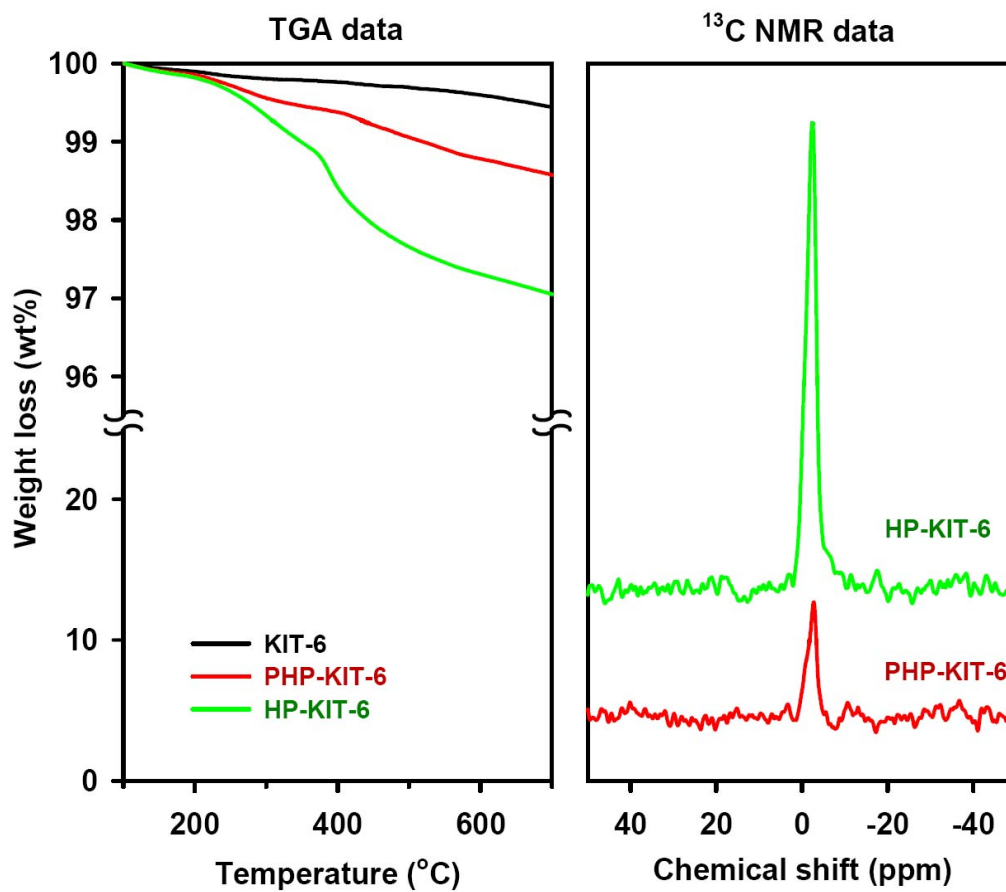

Fig. S2 TGA data and <sup>13</sup>C solid state NMR spectra for the mesoporous materials.

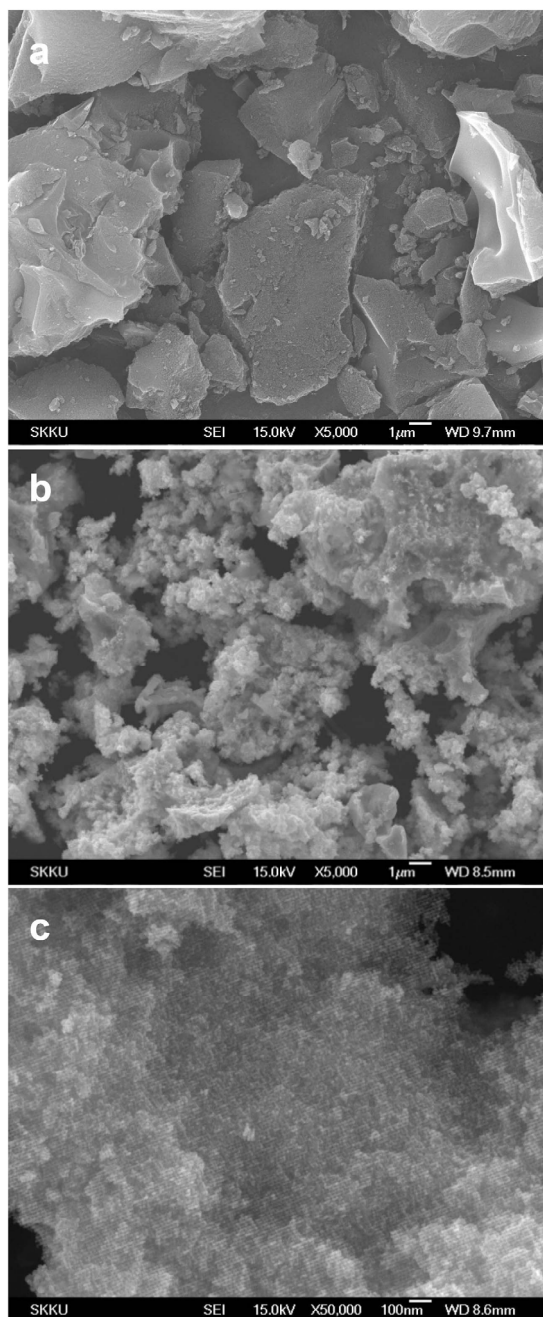

**Fig. S3 SEM images for (a) KIT-6 and (b,c) mesoporous silver material.**

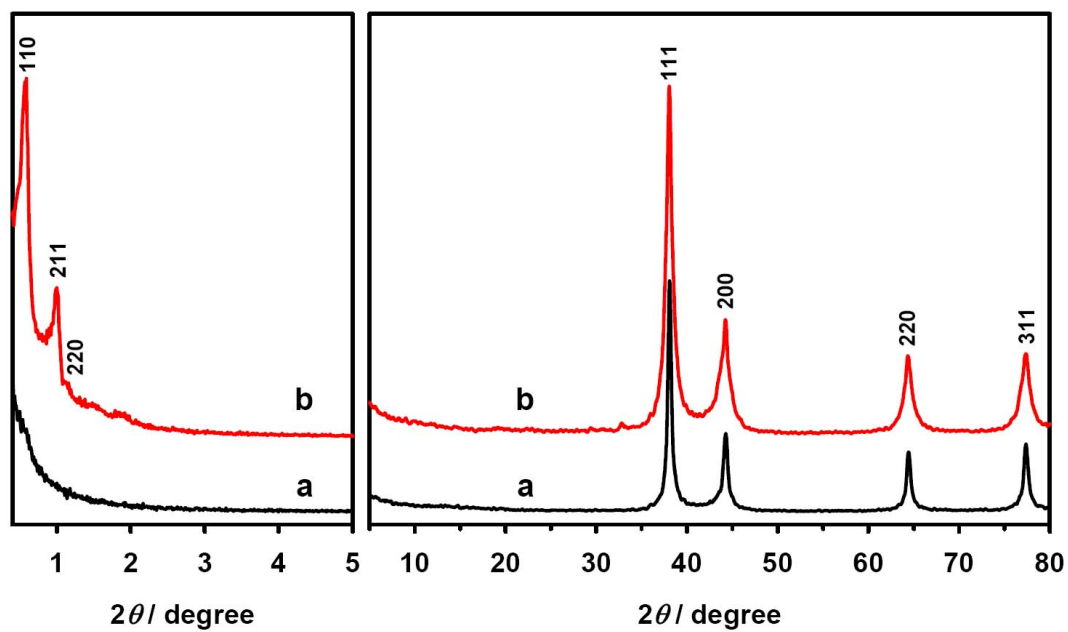

**Fig. S4** XRD patterns of silver materials obtained from (a) KIT-6 and (b) HP-KIT-6 templates.

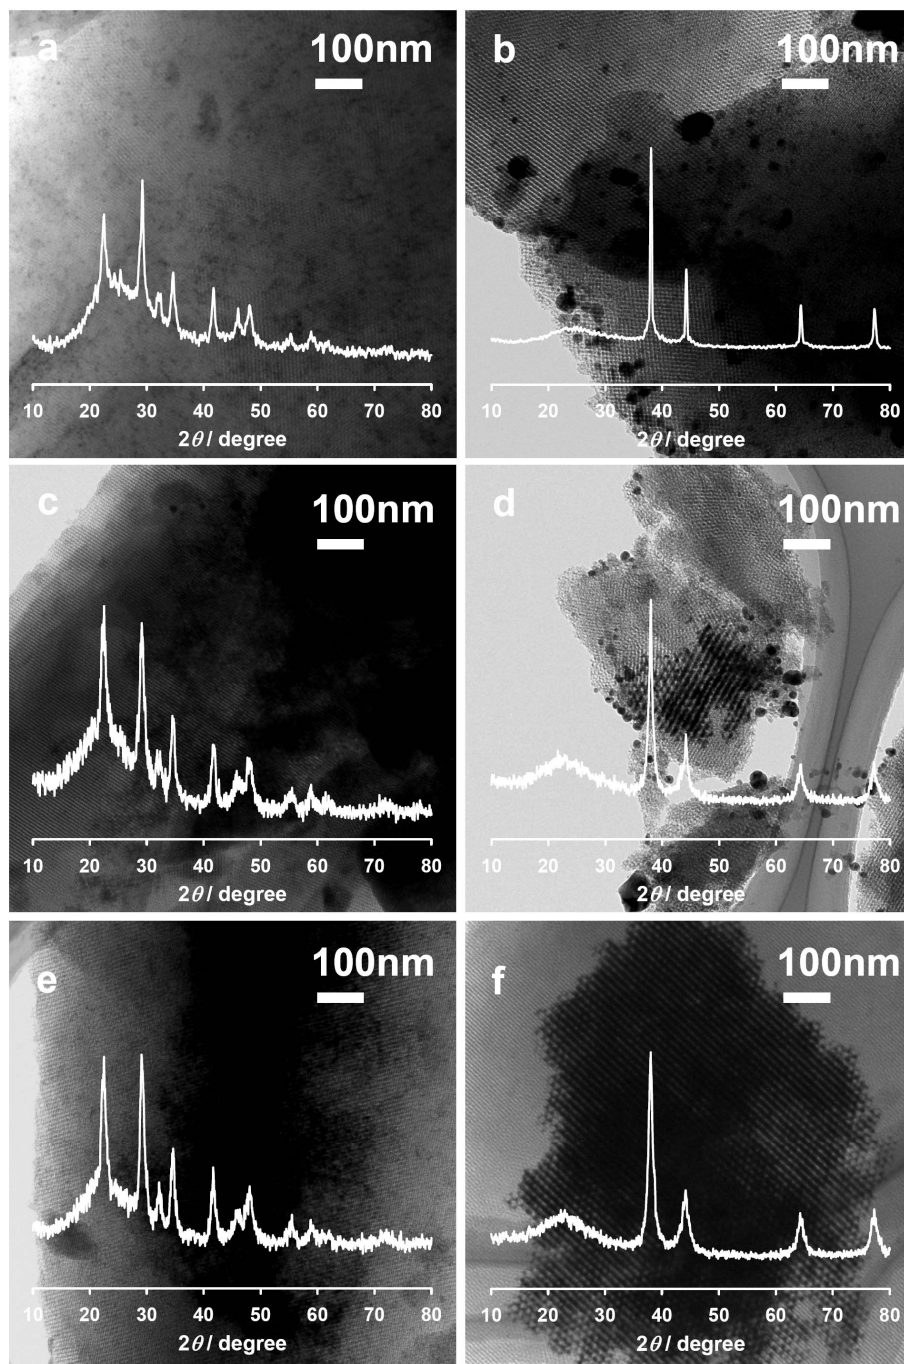

**Fig. S5** TEM images and XRD patterns obtained after the impregnation of  $\text{AgNO}_3$  and drying the samples at 353 K: (a) KIT-6, (c) PHP-KIT-6 and (e) HP-KIT-6, and after the reduction process: (b) KIT-6, (d) PHP-KIT-6 and (f) HP-KIT-6.

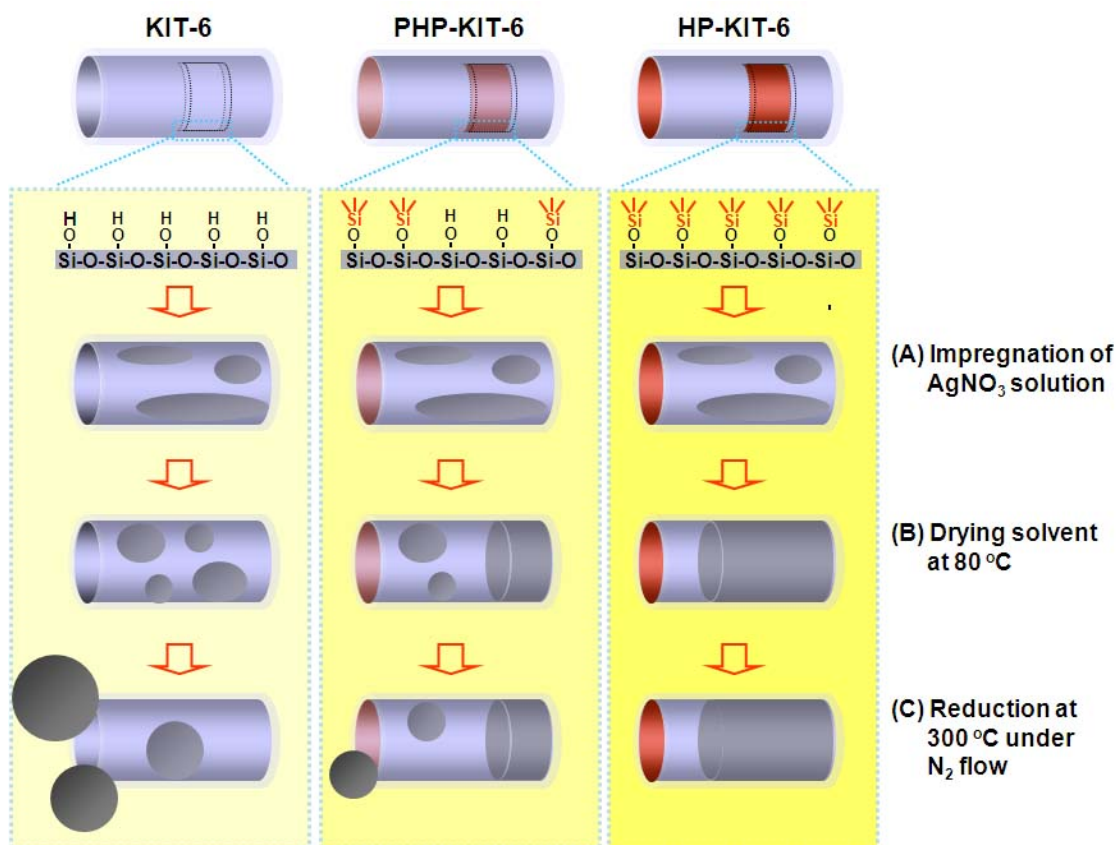

**Fig. S6** Schematic diagram for the formation mechanism of silver materials depending on surface hydrophobicity in the present work.
